# Supplementary material for: A study of the effect of the interaction between the active center and the ligand environment of ionomer-based catalysts on the oxygen evolution reaction
Source: Royal Society of Chemistry journal article supplement (doi:10.1039/d4nj01612b), 2024-01-01
Supplement: d4nj01612b1.pdf [file d4nj01612b1.pdf]

## Supporting Information

### **Study of the effect of the interaction between the active center and the ligand environment of ionomer-based catalyst on the oxygen evolution reaction**

*Yong Yan<sup>a</sup>, Jie Zhang<sup>a</sup>, Ruilin Wang<sup>a,b</sup>, Jinwei Chen<sup>a,b\*</sup>*

\*Corresponding authors. Tel.: 86 028 8541-8786. E-mail: [jwchen@scu.edu.cn](mailto:jwchen@scu.edu.cn)

<sup>a</sup> College of Materials Science and Engineering, Sichuan University, 610065 Chengdu, P.R. China

<sup>b</sup> Engineering Research Center of Alternative Energy Materials & Devices, Ministry of Education, Sichuan University, 610065 Chengdu, P.R. China

---

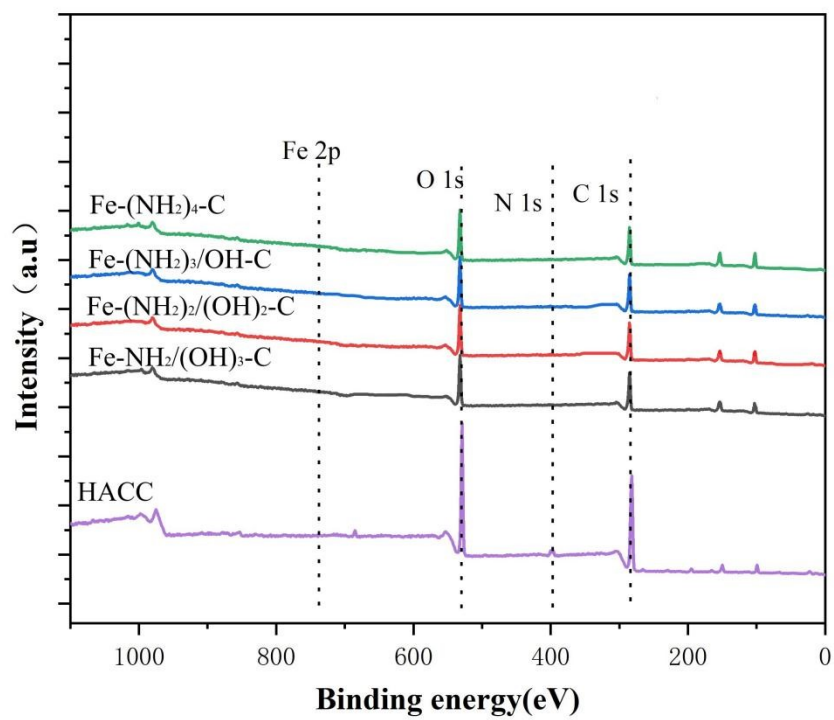

**Figure S1.** Total XPS spectrogram of the composition and chemical of HACC and quaternary ferric chitosan (Fe-(NH<sub>2</sub>)<sub>4</sub>-C, Fe-(NH<sub>2</sub>)<sub>3</sub>/OH-C, Fe-(NH<sub>2</sub>)<sub>2</sub>/(OH)<sub>2</sub>-C vs. Fe-NH<sub>2</sub>/(OH)<sub>3</sub>-C) complexes.

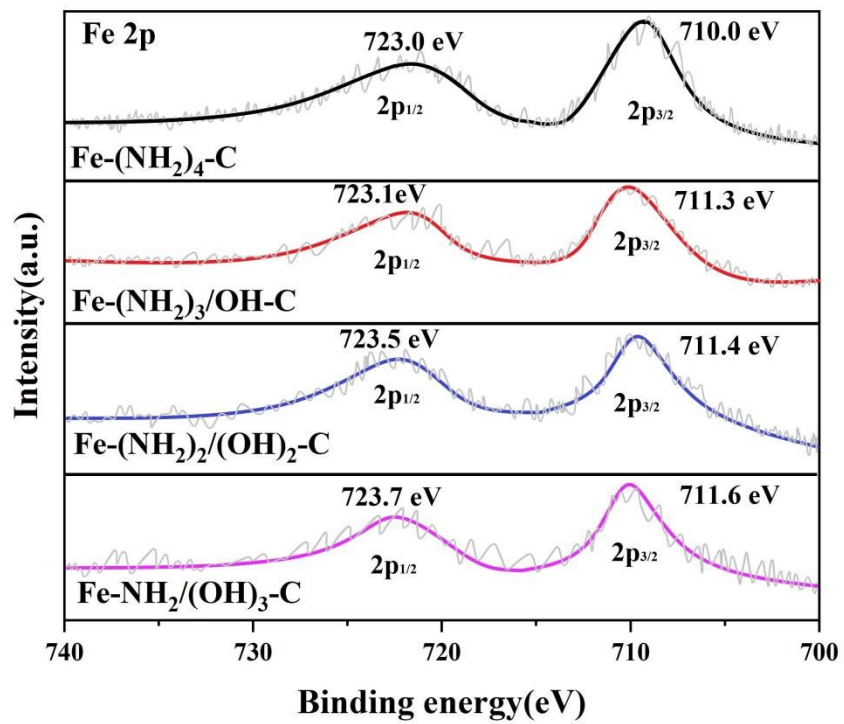

**Figure S2.** Fe 2p XPS spectra of the composition and chemical of quaternary ferric chitosan (Fe-(NH<sub>2</sub>)<sub>4</sub>-C, Fe-(NH<sub>2</sub>)<sub>3</sub>/OH-C, Fe-(NH<sub>2</sub>)<sub>2</sub>/(OH)<sub>2</sub>-C vs. Fe-NH<sub>2</sub>/(OH)<sub>3</sub>-C) complexes.

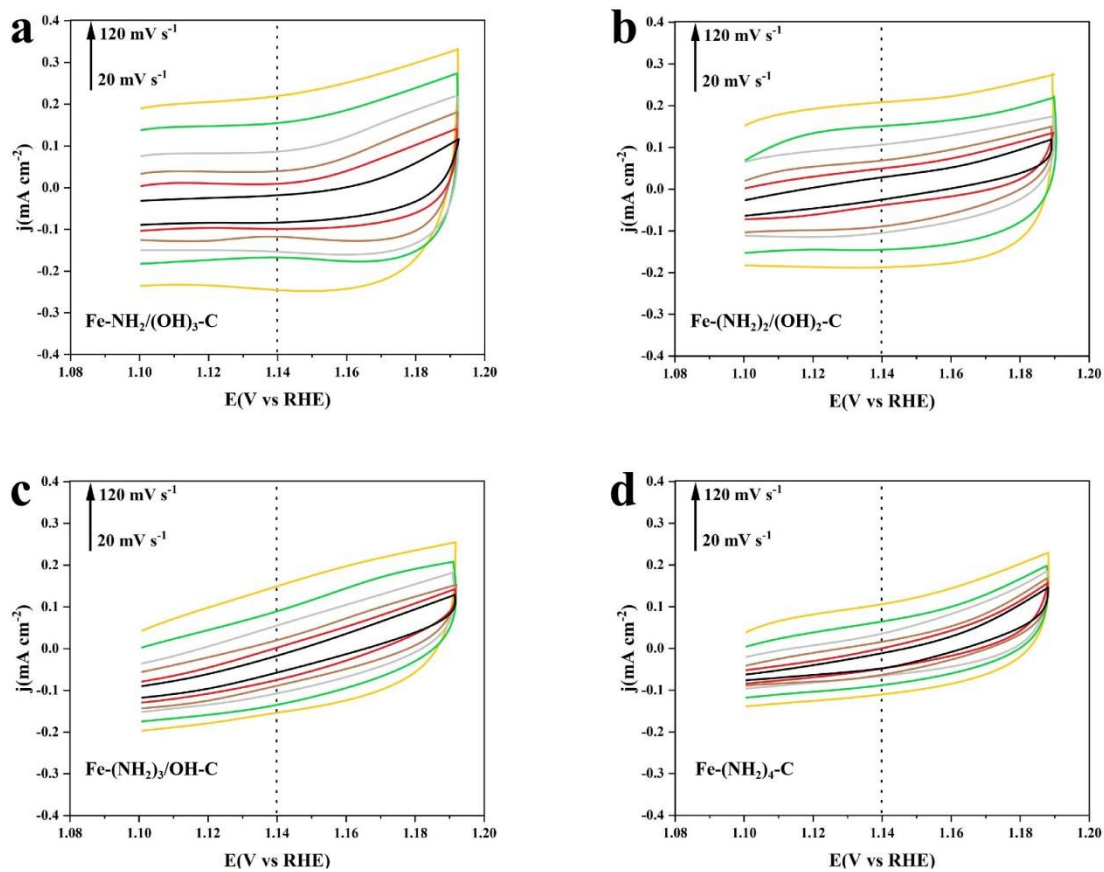

**Figure S3.** CV curves for Fe-(NH<sub>2</sub>)<sub>4</sub>-C, Fe-(NH<sub>2</sub>)<sub>3</sub>/OH-C, Fe-(NH<sub>2</sub>)<sub>2</sub>/(OH)<sub>2</sub>-C Fe-NH<sub>2</sub>/(OH)<sub>3</sub>-C complexes at different rates (0.02, 0.04, 0.06, 0.08, 0.10, 0.12 and 0.14 V/s).

**Table S1** Main infrared spectrum HACCTa of HACC and quaternary ammonium chitosan iron (Fe-(NH<sub>2</sub>)<sub>4</sub>-C, Fe-(NH<sub>2</sub>)<sub>3</sub>/OH-C, Fe-(NH<sub>2</sub>)<sub>2</sub>/ (OH)<sub>2</sub>-C and Fe-NH<sub>2</sub>/ (OH)<sub>3</sub>-C) complex (cm<sup>-1</sup>).

| Sample | $\nu_{\text{N-H}}+\nu_{\text{O-H}}$ | $\delta_{\text{N-H}}$ | $\nu_{\text{C-OH}}$ | $\nu_{\text{C-OH}}$ |
|--------|-------------------------------------|-----------------------|---------------------|---------------------|
| HACC   | 3431.13                             | 1550.66               | 1076.21             | 1026.06             |
| A      | 3321.58                             | 1480.73               | 1072.35             | 1023.56             |
| B      | 3315.61                             | 1485.21               | 1026.78             | 989.73              |
| C      | 3305.79                             | 1490.82               | 959.56              | 915.13              |
| D      | 3248.01                             | 1496.25               | 933.71              | 909.22              |

**Table S2.** The overpotential at 10 mA cm<sup>-2</sup> of Fe-NH<sub>2</sub>/(OH)<sub>3</sub>-C and other reported Fe-based catalysts for OER in 1 M KOH solution.

| Sample                                                                 | Overpotential (mV) at 10 mA<br>cm <sup>-2</sup> | Tafel slope<br>(mV dec <sup>-1</sup> ) | References |
|------------------------------------------------------------------------|-------------------------------------------------|----------------------------------------|------------|
| Fe-NH <sub>2</sub> /(OH) <sub>3</sub> -C                               | 255                                             | 67.3                                   | This work  |
| CN-FeO <sub>x</sub> -OH                                                | 322                                             | 124.3                                  | [1]        |
| RuO <sub>2</sub>                                                       | 283                                             | 104.7                                  | [2]        |
| Co-Fe-N-C                                                              | ~310                                            | 40                                     | [3]        |
| Fe/SNCFs-NH <sub>3</sub>                                               | ~520                                            | –                                      | [4]        |
| Fe-N-C/FeP <sub>x</sub> /NPSC                                          | 370                                             | 103                                    | [5]        |
| Fe-SAs/Fe <sub>3</sub> C-Fe@NC                                         | 330                                             | 56                                     | [6]        |
| CoFe-LDHs                                                              | 310                                             | 59                                     | [7]        |
| A-Ir <sub>1</sub> /Co <sub>0.8</sub> Fe <sub>0.2</sub> Se <sub>2</sub> | 230                                             | –                                      | [8]        |
| Co <sub>0.8</sub> Fe <sub>0.2</sub> Se <sub>2</sub> @Ni foam           | 370                                             | –                                      | [9]        |
| Ni <sub>1/2</sub> Fe <sub>1/2</sub> (OH) <sub>2</sub> /CNT-24          | 244                                             | 41                                     | [10]       |

**Table S3.** Current density attenuation of samples Fe-(NH<sub>2</sub>)<sub>4</sub>-C, Fe-(NH<sub>2</sub>)<sub>3</sub>/OH-C, Fe-(NH<sub>2</sub>)<sub>2</sub>/(OH)<sub>2</sub>-C and Fe-NH<sub>2</sub>/(OH)<sub>3</sub>-C after 12 h stability test.

| Sample                                                   | Current density attenuation (vs 10 mA cm <sup>-2</sup> ) |
|----------------------------------------------------------|----------------------------------------------------------|
| Fe-(NH <sub>2</sub> ) <sub>4</sub> -C                    | 39.6%                                                    |
| Fe-(NH <sub>2</sub> ) <sub>3</sub> /OH-C                 | 20.8%                                                    |
| Fe-(NH <sub>2</sub> ) <sub>2</sub> /(OH) <sub>2</sub> -C | 12.7%                                                    |
| Fe-NH <sub>2</sub> /(OH) <sub>3</sub> -C                 | 1.3%                                                     |

## Reference

1. Jing, T.; Zhang, N.; Zhang, C.; Mourdikoudis, S.; Sofer, Z.; Li, W.; Li, P.; Li, T.; Zuo, Y.; Rao, D., Improving C–N–FeO<sub>x</sub> Oxygen Evolution Electrocatalysts through Hydroxyl-Modulated Local Coordination Environment. *ACS Catalysis* **2022**, *12* (12), 7443-7452.
2. Li, P.; Wang, M.; Duan, X.; Zheng, L.; Cheng, X.; Zhang, Y.; Kuang, Y.; Li, Y.; Ma, Q.; Feng, Z.; Liu, W.; Sun, X., Boosting oxygen evolution of single-atomic ruthenium through electronic coupling with cobalt-iron layered double hydroxides. *Nat Commun* **2019**, *10* (1), 1711.
3. Bai, L.; Hsu, C.-S.; Alexander, D. T. L.; Chen, H. M.; Hu, X., Double-atom catalysts as a molecular platform for heterogeneous oxygen evolution electrocatalysis. *Nature Energy* **2021**, *6* (11), 1054-1066.
4. Yang, L.; Zhang, X.; Yu, L.; Hou, J.; Zhou, Z.; Lv, R., Atomic Fe-N<sub>4</sub>/C in Flexible Carbon Fiber Membrane as Binder-Free Air Cathode for Zn-Air Batteries with Stable Cycling over 1000 h. *Adv Mater* **2022**, *34* (5), e2105410.
5. Li, P.; Wang, H.; Fan, W.; Huang, M.; Shi, J.; Shi, Z.; Liu, S., Salt assisted fabrication of lignin-derived Fe, N, P, S codoped porous carbon as trifunctional catalyst for Zn-air batteries and water-splitting devices. *Chemical Engineering Journal* **2021**, *421*.
6. Sun, X.; Wei, P.; Gu, S.; Zhang, J.; Jiang, Z.; Wan, J.; Chen, Z.; Huang, L.; Xu, Y.; Fang, C.; Li, Q.; Han, J.; Huang, Y., Atomic-Level Fe-N-C Coupled with Fe<sub>3</sub>C-Fe Nanocomposites in Carbon Matrixes as High-Efficiency Bifunctional Oxygen Catalysts. *Small* **2020**, *16* (6), e1906057.
7. Lv, J.; Liu, P.; Li, R.; Wang, L.; Zhang, K.; Zhou, P.; Huang, X.; Wang, G., Constructing accelerated charge transfer channels along V-Co-Fe via introduction of V into CoFe-layered double hydroxides for overall water splitting. *Applied Catalysis B: Environmental* **2021**, *298*.
8. Pandit, M. A.; Hemanth Kumar, D. S.; Ramadoss, M.; Chen, Y.; Muralidharan, K., Template free-synthesis of cobalt-iron chalcogenides [Co<sub>0.8</sub>Fe<sub>0.2</sub>L<sub>2</sub>, L = S, Se] and their robust bifunctional electrocatalysis for the water splitting reaction and Cr(vi) reduction. *RSC Adv* **2022**, *12* (13), 7762-7772.
9. Zhang, Z.; Feng, C.; Liu, C.; Zuo, M.; Qin, L.; Yan, X.; Xing, Y.; Li, H.; Si, R.; Zhou, S.; Zeng, J., Electrochemical deposition as a universal route for fabricating single-atom catalysts. *Nat Commun* **2020**, *11* (1), 1215.
10. Ge, J.; Zheng, J. Y.; Zhang, J.; Jiang, S.; Zhang, L.; Wan, H.; Wang, L.; Ma, W.; Zhou, Z.; Ma, R., Controllable atomic defect engineering in layered Ni<sub>x</sub>Fe<sub>1-x</sub>(OH)<sub>2</sub> nanosheets for electrochemical overall water splitting. *Journal of Materials Chemistry A* **2021**, *9* (25), 14432-14443.
